# Supplementary material for: Radioactive Seed Localization for Nonpalpable Breast Lesions: Systematic Review and Meta-Analysis
Source: MDPI journal article supplement (doi:10.3390/diagnostics14040441), 2024-02-17
Supplement: s1 [file s1]

# Supporting Information for

## **Radioactive seed localization for nonpalpable breast lesions: systematic review and meta-analysis**

### **1. Search strategy**

#### 1. ClinicalTrials.gov

((breast cancer\*) OR (breast neoplasm\*) OR (breast carcinoma\*) OR (breast lesion\*) OR ("nonpalpable") OR ("non-palpable") OR ("non palpable") OR ("impalpable") OR ("occult") OR (breast surgery) OR (radioguided surgery) OR (lumpectomy\*)) AND ((localization\*) OR (radioactive seed\*) OR (radioguided seed\*) OR (iodine seed\*) OR (iodine-125) OR (125i seed\*) OR (rollis) OR (rsl) OR (wire localization) OR (wgl) OR (radioguided occult lesion localization) OR (roll))

#### 2. Embase

#1. 'breast cancer'/exp OR 'breast surgery'/exp

#2. 'breast cancer\*' OR 'breast neoplasm\*' OR 'breast carcinoma\*' OR 'breast lesion\*'

#3. 'nonpalpable' OR 'non-palpable' OR 'non palpable' OR 'impalpable' OR 'occult'

#4. 'breast surgery' OR 'radioguided surgery' OR 'lumpectomy\*'

#5. 'radioactive seed'/exp

#6. 'seed\* localization\*' OR 'radioactive seed\*' OR 'radioguided seed\*' OR 'iodine seed\*' OR 'iodine-125' OR '125i seed\*' OR 'rollis' OR 'rsl'

#7. 'wire localization' OR 'wgl' OR 'radioguided occult lesion localization' OR 'roll'

#8. #1 OR #2 OR #3 OR #4

#9. #5 OR #6 OR #7

#10. #8 AND #9

### 3. LILACS

#1 (mh:(breast cancer)) OR (mh:(breast surgery))

#2 (breast cancer\*) OR (breast neoplasm\*) OR (breast carcinoma\*) OR (breast lesion\*)

#3 (nonpalpable) OR (non-palpable) OR (non palpable) OR (impalpable) OR (occult)

#4 (breast surgery) OR (radioguided surgery) OR (lumpectomy\*) 2394

#5 #1 OR #2 OR #3 OR #4

#6 (mh:(localization))

#7 (localization\*) OR (radioactive seed\*) OR (radioguided seed\*) OR (iodine seed\*) OR (iodine-125) OR (125I seed\*) OR (rollis) OR (rsl) 2343

#8 (wire localization) OR (wgl) OR (radioguided occult lesion localization) OR (roll)

#9 #6 OR #7 OR #8

#10 #5 AND #9

### 4. PubMed

(((((breast cancer[MeSH Terms]) OR (breast surgery[MeSH Terms])) OR (((breast cancer\*) OR (breast neoplasm\*)) OR (breast carcinoma\*)) OR (breast lesion\*))) OR (((("nonpalpable") OR ("non palpable")) OR ("non-palpable")) OR ("impalpable")) OR ("occult")) OR (((breast surgery) OR (radioguided surgery)) OR (lumpectomy\*)) AND (((radioactive seed[MeSH Terms]) OR (((((((seed\* localization\*) OR (radioactive seed\*)) OR (radioguided seed\*)) OR (iodine seed\*)) OR (iodine-125)) OR (125I seed\*)) OR (rollis)) OR (rsl))) OR (((wire localization) OR (wgl)) OR (radioguided occult lesionlocalization)) OR (roll)))

### 5. SciELO

#1 (breast cancer\*) OR (breast neoplasm\*) OR (breast carcinoma\*) OR (breast lesion\*)

#2 ("nonpalpable") OR ("non-palpable") OR ("non palpable") OR ("impalpable") OR ("occult")

#3 (breast surgery) OR (radioguided surgery) OR (lumpectomy\*) 756

#4 #1 OR #2 OR #3

#5 (localization\*) OR (radioactive seed\*) OR (radioguided seed\*) OR (iodine seed\*) OR (iodine-125) OR (125i seed\*) OR (rollis) OR (rsl)

#6 (wire localization) OR (wgl) OR (radioguided occult lesion localization) OR (roll)

#7 #5 OR #6

#8 #4 AND #7

#### 6. Web of Science

#1 ALL= (breast cancer\*) OR ALL= (breast neoplasm\*) OR ALL= (breast carcinoma\*) OR ALL= (breast lesion\*)

#2 ALL= ("nonpalpable") OR ALL= ("non-palpable") OR ALL= ("non palpable") OR ALL= ("impalpable") OR ALL= ("occult")

#3 ALL= (breast surgery) OR ALL= (radioguided surgery) OR ALL= (lumpectomy\*)

#4 #1 OR #2 OR #3

#5 ALL= (seed localization) OR ALL= (radioactive seed\*) OR ALL= (radioguided seed\*) OR ALL= (iodine seed\*) OR ALL= (iodine-125) OR ALL= (125i seed\*) OR ALL= (rollis) OR ALL= (rsl)

#6 ALL= (wire localization) OR ALL= (wgl) OR ALL= (radioguided occult lesion localization) OR ALL= (roll)

#7 #5 OR #6

#8 #4 AND #7

#### 7. Manual search in reference lists

- a. Ahmed, M.; Douek, M. Radioactive seed localisation (RSL) in the treatment of non-palpable breast cancers: Systematic review and meta-analysis. *The Breast*, v. 22, n. 4, p. 383-388, 2013.
- b. Barentsz, M. W.; Van Den Bosch, M. A. A. J.; Veldhuis, W. B.; et al. Radioactive seed localization for non-palpable breast cancer. *Br J Surg.*, v. 100, n. 5, p. 582-588, 2013.

- c. Chan, B. K. Y.; Wiseberg-Firtell, J. A.; Jois, R. H. S.; et al. Localization techniques for guided surgical excision of non-palpable breast lesions. *Cochrane Database of Systematic Reviews*, v. x, n. 12, p. x-x, 2015.
- d. Gray, R. J.; Pockaj, B. A.; Garvey, E.; et al. Intraoperative margin management in breast-conserving surgery: a systematic review of the literature. *Ann Surg Oncol.*, v. 25, n. 1, p. 18-27, 2018.
- e. Fusco, R.; Petrillo, A.; Catalano, O.; et al. Procedures for location of non-palpable breast lesions: a systematic review for the radiologist. *Breast Cancer*, v. 21, n. 5, p. 522–531, 2014.
- f. Moreira, I. C.; Ventura, S. R.; Ramos, I.; et al. Preoperative localisation techniques in breast conservative surgery: A systematic review and meta-analysis. *Surgical Oncology*, v. 35, n. x, p. 351–373, 2020.
- g. Pouw, B.; Wit-Van Der Veen, L. J.; Stokkel, M. P. M.; et al. Heading Toward Radioactive Seed Localization in Non-Palpable Breast Cancer Surgery? A Meta-Analysis. *Journal of Surgical Oncology*, v. 111, n. 2, p.185–191, 2015.
- h. Wang, G.; Tsikouras, P.; Zuo, H.; et al. Radioactive seed localization and wire guided localization in breast cancer: A systematic review and meta-analysis. *JBUON*, v. 24, n. 1, p. 48-60, 2019.
- i. Xu, X. J.; Li, J. J.; Ji, W. B. An updated Meta-Analysis of radioactive seed localization versus wire-guided localization in the treatment of nonpalpable breast lesions. *Breast J.*, v. 24, n. 4, p. 673-675, 2018.
- j. Aetna. Breast Biopsy Procedures. Medical Clinical Policy Bulletins, 2020.
- k. Preoperative seed Placement for breast cancer surgery: clinical effectiveness, cost-effectiveness, and guidelines. Ottawa: CADTH, 2019
- l. INESSS. Utilization de la bille radioactive pour la localisation preoperatoire de tumeurs mammaires non palpables. Note informative, 2016.

## 2. Eligibility criteria of studies for review

- **Population**

Inclusion: women, of any age over eighteen years old, diagnosed with a nonpalpable breast lesion, eligible for surgical intervention.

Exclusion: age under 18, pregnancy, men.

- **Intervention**

Inclusion: RSL with Iodine-125 for nonpalpable breast lesion conservative surgery.

Exclusion: RSL for other regions than the breast.

- **Comparator**

Inclusion: WGL and ROLL for nonpalpable breast lesion conservative surgery.

Exclusion: WGL and ROLL for other regions than the breast.

- **Outcomes**

Primaries: surgical margins, intraoperative re-excision, reoperation, recurrence, complications.

Secondaries: specimen volume, SLNB identification failure, localization time, operation time, interval time between localization and surgery, intervention evaluation by the patient and medical team.

- **Study design**

Inclusion: randomized clinical trial and cohort study with more than 10 patients, who compare RSL against ROLL and/or WGL.

Exclusion: reviews, letters, abstracts, comments, in vitro assays.

### 3. Summary of the Results

Figure SI1 summarizes the results.

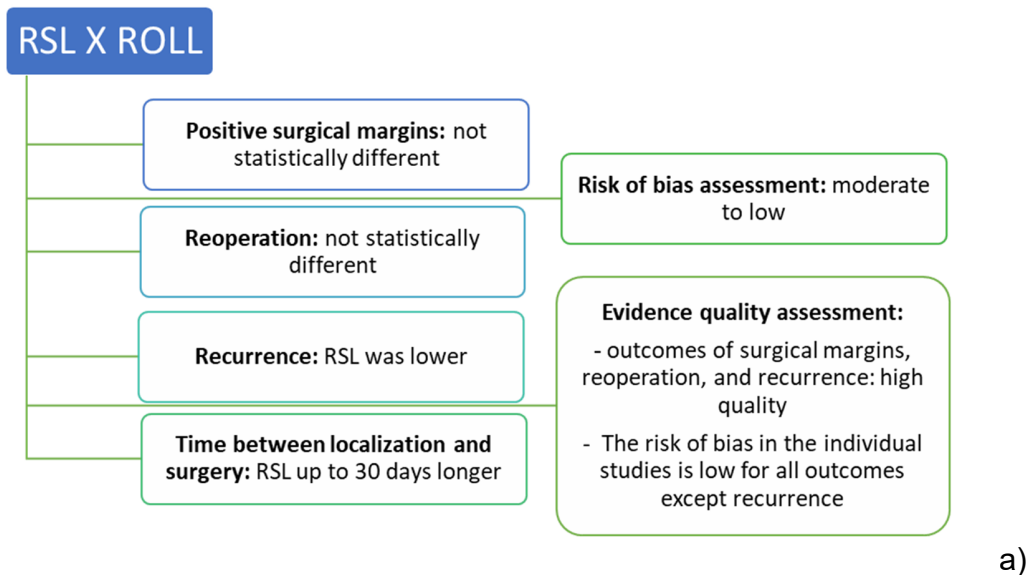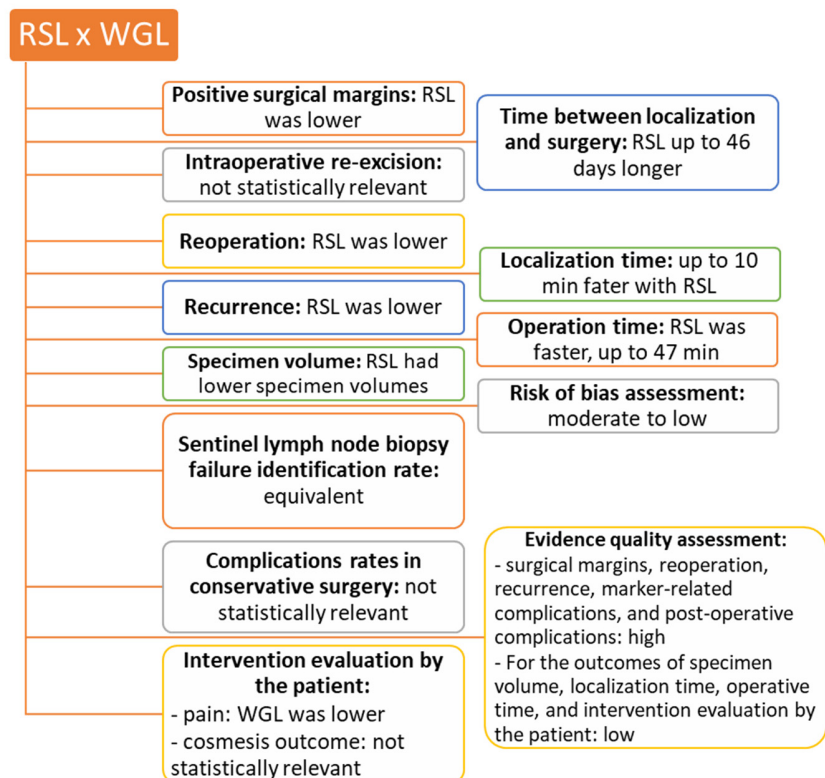

Figure SI1: Summary of the results a) RSL x ROLL b) RSL x WGL.

#### **4. Observations**

- The outcome of the intervention evaluation by the medical team was reported by only 1 study and therefore data synthesis was not performed. Outcomes of positive surgical margins, intraoperative re-excision, reoperation, recurrence, specimen volume, sentinel node biopsy identification failure, complications, intervention evaluation by the patient, time between localization and surgery, localization time, and operative time are presented in the subtopics below.
